# Supplementary material for: MITF regulates IDH1, NNT, and a transcriptional program protecting melanoma from reactive oxygen species
Source: PubMed Central journal article supplement (PMC11401838; doi:10.1038/s41598-024-72031-9), 2024-09-14
Supplement: 41598_2024_72031_MOESM1_ESM.pdf [file 41598_2024_72031_MOESM1_ESM.pdf]

## Supplementary Materials for

# MITF regulates IDH1, NNT, and a transcriptional program protecting melanoma from reactive oxygen species

### Authors

Elisabeth Roider<sup>1,2,3\*</sup>†, Alexandra I.T. Lakatos<sup>4,5,6</sup> †, Alicia M. McConnell<sup>7</sup>, Poguang Wang<sup>8</sup>, Alina Mueller<sup>3</sup>, Akinori Kawakami<sup>1</sup>, Jennifer Tsoi<sup>9,10</sup>, Botond L. Szabolcs<sup>4,5,6</sup>, Anna A. Ascsillán<sup>4,5,6</sup>, Yusuke Suita<sup>1</sup>, Vivien Igras<sup>1</sup>, Jennifer A. Lo<sup>1</sup>, Jennifer J. Hsiao<sup>1</sup>, Rebecca Lapidés<sup>1,12</sup>, Dorottya M.P. Pál<sup>4,5,6</sup>, Anna S. Lengyel<sup>4,5,6</sup>, Alexander Navarini<sup>3</sup>, Arimichi Okazaki<sup>2</sup>, Othon Iliopoulos<sup>2</sup>, István Németh<sup>13</sup>, Thomas G. Graeber<sup>9,10,11</sup>, Leonard Zon<sup>7</sup>, Roger W. Giese<sup>8</sup>, Lajos V. Kemeny<sup>1,2,4,5,6\*</sup>‡, David E. Fisher<sup>1,2,14\*</sup>‡

†These authors contributed equally to this work

‡These authors contributed equally to this work

\* Corresponding authors. Email: [Elisabeth.Roider@usb.ch](mailto:Elisabeth.Roider@usb.ch) (E.R.), [Kemeny.lajos@semmelweis.hu](mailto:Kemeny.lajos@semmelweis.hu) (L.V.K.), [dfisher3@mg.harvard.edu](mailto:dfisher3@mg.harvard.edu) (D.E.F.)

### This PDF file includes:

Fig. S1. MITF regulates genes involved in oxidative-reductive processes in melanoma

Fig. S2. Features of zebrafish melanoma model

Fig. S3. MALDI-TOF mass spectra

Fig. S4. Relative MITF mRNA levels after MITF silencing or overexpression

### Other Supplementary Material for this manuscript includes the following:

Table S1. Supplementary Table 1. Gene sets enriched in genes downregulated after MITF KD in MALME-3M cells by DAVID. Yellow highlight indicates gene sets associated with ROS that were used to define MITF-driven redox program score in Table S3.

Table S2. Supplementary Table 2. Gene sets enriched in genes downregulated after MITF KD in MALME-3M cells by DAVID after redundant gene set removal by REVIGO.

Table S3. Supplementary Table 3. Genes and gene sets to define the MITF-driven redox program score based on the genes annotated to redox processes whose expression in MALME-3M cells changes significantly after *MITF* knockdown.

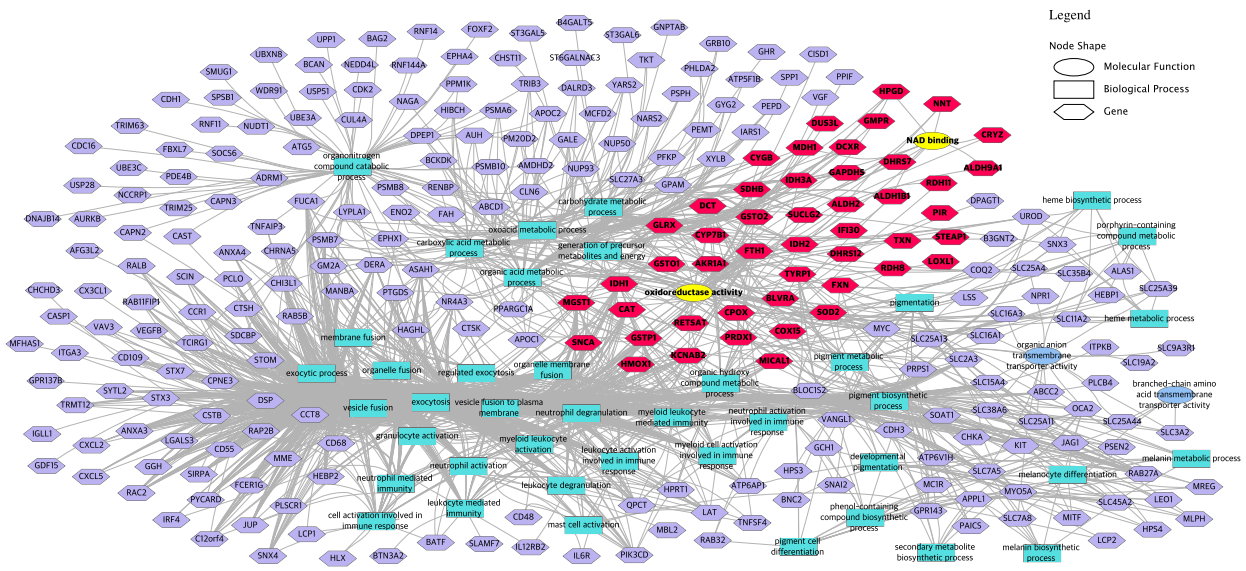

**Fig. S1.** MITF regulates genes involved in oxidative-reductive processes in melanoma. The oxidoreductase activity gene set is enriched in high MITF melanoma cell lines in short-term melanoma cultures. GSEA results were visualized by Cytoscape. Abbreviations: MITF: Microphthalmia-associated transcription factor

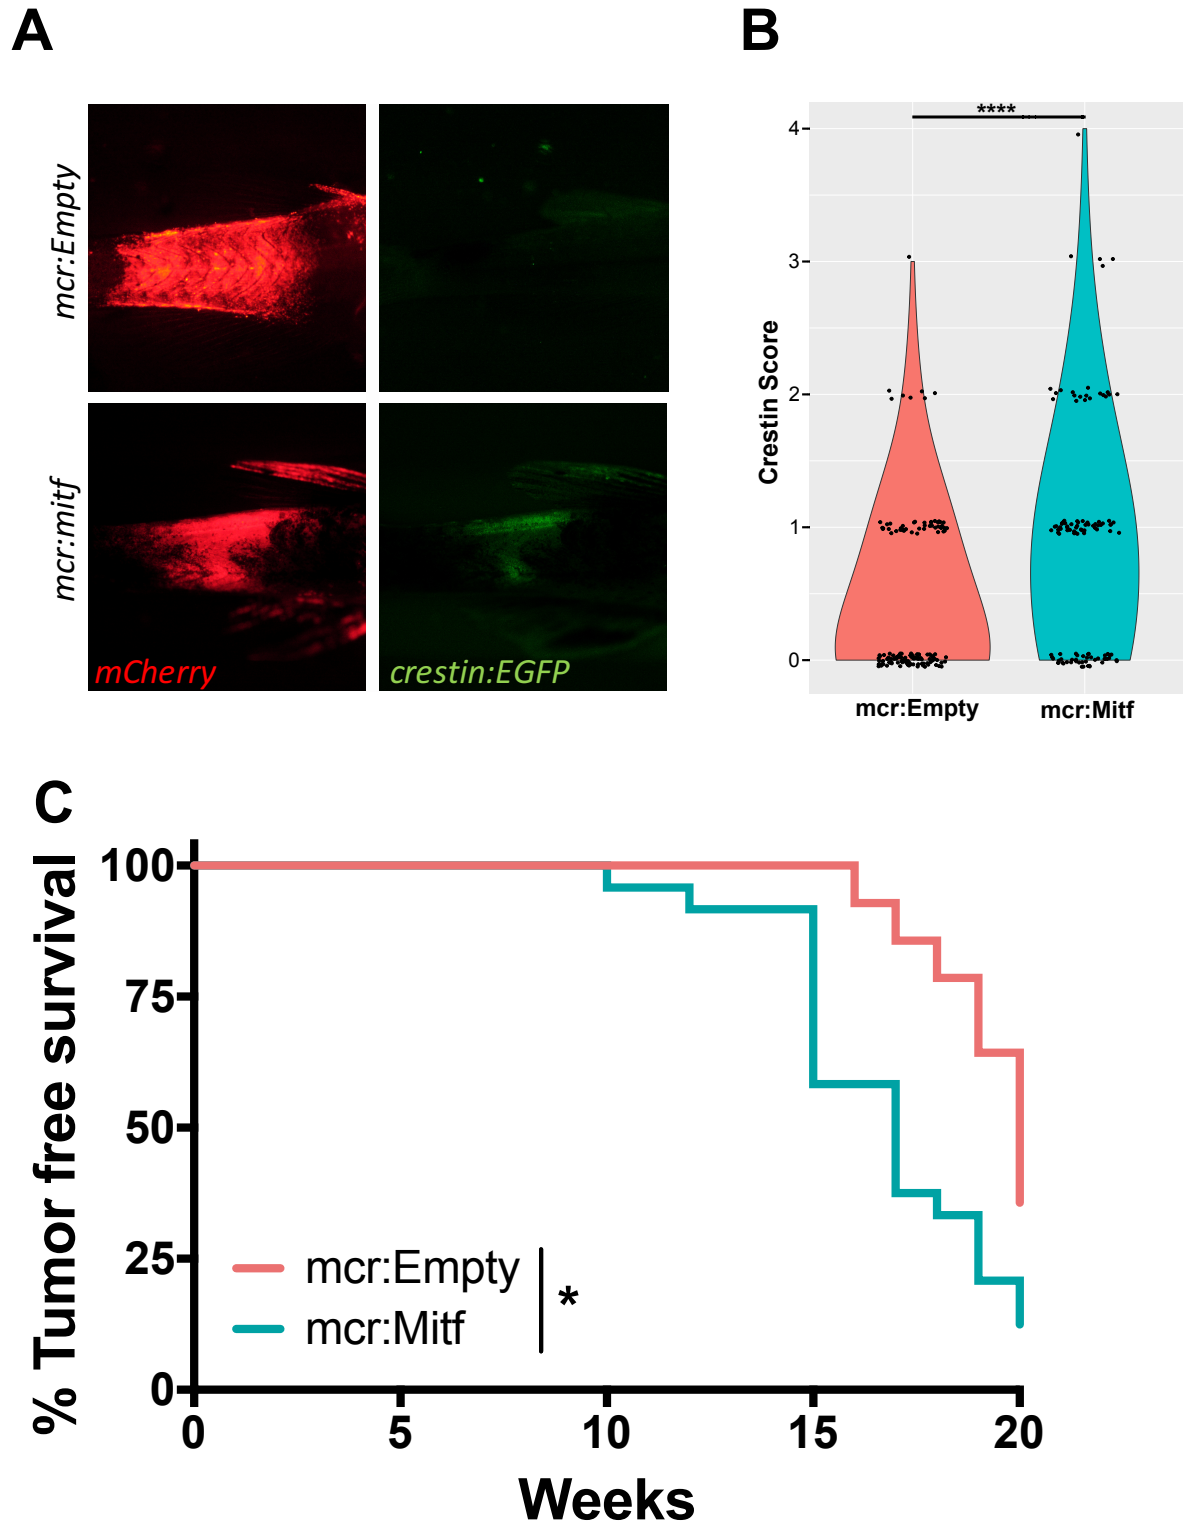

**Fig. S2. Features of zebrafish melanoma model.** Fluorescent images (A) and quantitation (B) show rescued melanocytes (*mitf:mCherry*<sup>+</sup> cells) and neural crest reactivation in early melanoma patches (*crestin:EGFP*<sup>+</sup> cells) in 6-week-old *MITF* overexpressing (*mcr:MITF*) fish compared with control

(*mcr:Empty*) fish (scored on a 0-5 scale, with 5 representing a tumor). (C) Kaplan-Meier curve depicting the percent of *mcr:MITF* fish with tumor-free survival compared to control *mcr:Empty* fish. The *mcr:Empty* vectors was used as the negative control. Abbreviations: MITF: Microphthalmia-associated transcription factor

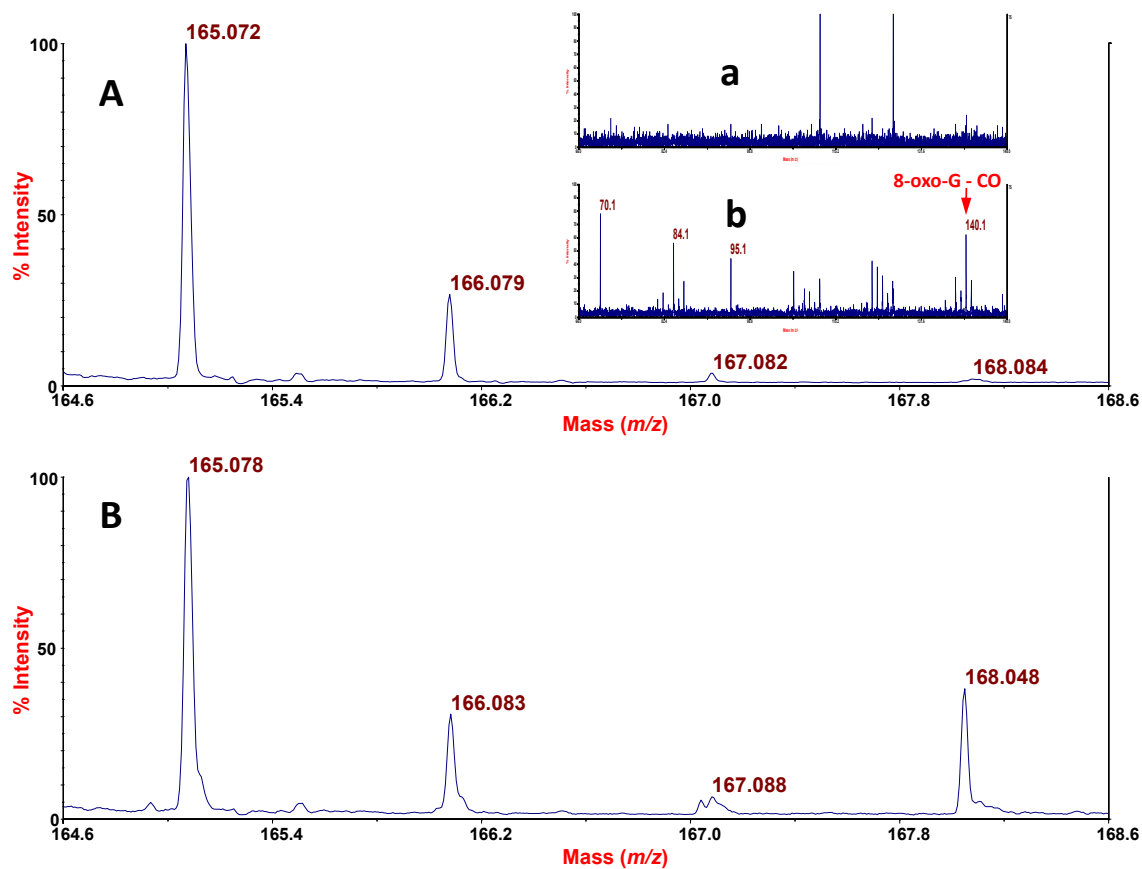

**Fig. S3. MALDI-TOF mass spectra.** (A) CCA matrix; (B) DNA from Mitf1, showing a peak for 8-oxo-G at m/z 168.048; a corresponding TOF/TOF spectrum of m/z 168 gave a peak at m/z 140.1 from loss of CO (insets a and b correspond to A and B, respectively). Abbreviations: 8-oxo-G: 8-Dihydro-8-oxoguanine

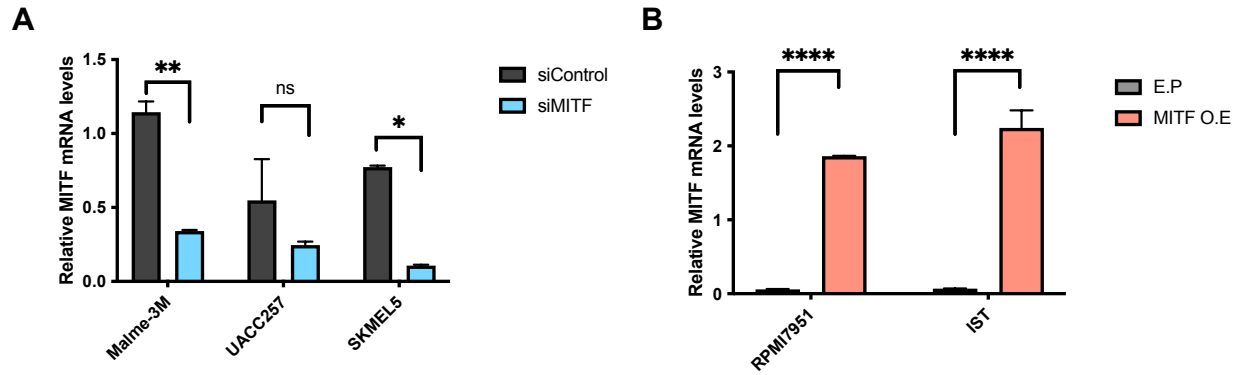

**Fig. S4. Relative MITF mRNA levels after MITF silencing or overexpression. (A)** Comparison of MITF mRNA levels following MITF gene knockdown compared to MITF control. **(B)** Comparison of MITF mRNA levels after MITF gene overexpression compared to MITF control. Non-targeting siRNA (siControl) and an empty plasmid (E.P.) were used as negative controls. All mRNA levels were normalized to RPL11. Values represent the mean  $\pm$  SEM. \* $p < 0.05$  \*\* $p < 0.01$ , \*\*\*\* $p < 0.0001$ . Abbreviations: MITF: Microphthalmia-associated transcription factor, E.P.: empty plasmid, O.E.: overexpression
